# Supplementary material for: Inverse and Proportional Trans Modulation of Gene Expression in Human Aneuploidies
Source: MDPI journal article supplement (doi:10.3390/genes15050637), 2024-05-17
Supplement: s1 [file s1]

**Table S1.** The number of all differentially expressed genes.

|           |        | all-transcripts |       |        | cis-transcripts |      |        | trans-transcripts |       |        |
|-----------|--------|-----------------|-------|--------|-----------------|------|--------|-------------------|-------|--------|
|           |        | all             | mRNA  | lncRNA | all             | mRNA | lncRNA | all               | mRNA  | lncRNA |
| trisomy13 | up     | 380             | 244   | 69     | 51              | 44   | 4      | 329               | 200   | 65     |
|           | down   | 1677            | 1304  | 120    | 14              | 12   | 1      | 1663              | 1292  | 119    |
|           | normal | 45694           | 28191 | 10310  | 675             | 426  | 120    | 45019             | 27765 | 10190  |
| trisomy18 | up     | 689             | 547   | 53     | 58              | 48   | 5      | 631               | 499   | 48     |
|           | down   | 1928            | 1340  | 285    | 10              | 9    | 0      | 1918              | 1331  | 285    |
|           | normal | 45134           | 27852 | 10161  | 588             | 369  | 150    | 44546             | 27483 | 10011  |
| trisomy21 | up     | 446             | 321   | 53     | 53              | 38   | 13     | 393               | 283   | 40     |
|           | down   | 320             | 233   | 31     | 0               | 0    | 0      | 320               | 233   | 31     |
|           | normal | 46985           | 29185 | 10415  | 515             | 272  | 153    | 46470             | 28913 | 10262  |

The number of all differentially expressed genes (DEGs, adjusted p-value < 0.05) in human autosomal aneuploidy trisomy 13, trisomy 18, and trisomy 21 is shown in the table.

**Table S2.** The number of low expressed DEGs.

|           |        | all-transcripts |      |        | cis-transcripts |      |        | trans-transcripts |      |        |
|-----------|--------|-----------------|------|--------|-----------------|------|--------|-------------------|------|--------|
|           |        | all             | mRNA | lncRNA | all             | mRNA | lncRNA | all               | mRNA | lncRNA |
| trisomy13 | up     | 38              | 14   | 16     | 1               | 1    | 0      | 37                | 13   | 16     |
|           | down   | 192             | 123  | 27     | 0               | 0    | 0      | 192               | 123  | 27     |
|           | normal | 9341            | 3717 | 3311   | 137             | 57   | 27     | 9204              | 3660 | 3284   |
| trisomy18 | up     | 43              | 22   | 11     | 2               | 1    | 1      | 41                | 21   | 10     |
|           | down   | 243             | 123  | 65     | 2               | 2    | 0      | 241               | 121  | 65     |
|           | normal | 9285            | 3709 | 3278   | 118             | 51   | 42     | 9167              | 3658 | 3236   |
| trisomy21 | up     | 63              | 38   | 13     | 2               | 0    | 2      | 61                | 38   | 11     |
|           | down   | 60              | 43   | 4      | 0               | 0    | 0      | 60                | 43   | 4      |
|           | normal | 9448            | 3773 | 3337   | 109             | 39   | 47     | 9339              | 3734 | 3290   |

The number of DEGs with low expression (mean counts > 5 and < 20, adjusted p-value < 0.05) in human autosomal aneuploidy trisomy 13, trisomy 18, and trisomy 21 is shown in the table.

**Table S3.** The number of medium expressed DEGs.

|           |        | all-transcripts |      |        | cis-transcripts |      |        | trans-transcripts |      |        |
|-----------|--------|-----------------|------|--------|-----------------|------|--------|-------------------|------|--------|
|           |        | all             | mRNA | lncRNA | all             | mRNA | lncRNA | all               | mRNA | lncRNA |
| trisomy13 | up     | 200             | 129  | 37     | 9               | 7    | 2      | 191               | 122  | 35     |
|           | down   | 725             | 534  | 55     | 9               | 8    | 1      | 716               | 526  | 54     |
|           | normal | 15816           | 7822 | 4818   | 233             | 119  | 65     | 15583             | 7703 | 4753   |
| trisomy18 | up     | 232             | 161  | 25     | 9               | 5    | 3      | 223               | 156  | 22     |
|           | down   | 812             | 512  | 132    | 5               | 4    | 0      | 807               | 508  | 132    |
|           | normal | 15697           | 7812 | 4753   | 216             | 111  | 79     | 15481             | 7701 | 4674   |
| trisomy21 | up     | 221             | 153  | 24     | 12              | 4    | 7      | 209               | 149  | 17     |
|           | down   | 146             | 101  | 15     | 0               | 0    | 0      | 146               | 101  | 15     |
|           | normal | 16374           | 8231 | 4871   | 199             | 83   | 72     | 16175             | 8148 | 4799   |

The number of DEGs with medium expression (mean counts > 20 and < 100, adjusted p-value < 0.05) in human autosomal aneuploidy trisomy 13, trisomy 18, and trisomy 21 is shown in the table.

**Table S4.** The number of high expressed DEGs.

|           |        | all-transcripts |       |        | cis-transcripts |      |        | trans-transcripts |       |        |
|-----------|--------|-----------------|-------|--------|-----------------|------|--------|-------------------|-------|--------|
|           |        | all             | mRNA  | lncRNA | all             | mRNA | lncRNA | all               | mRNA  | lncRNA |
| trisomy13 | up     | 142             | 101   | 16     | 41              | 36   | 2      | 101               | 65    | 14     |
|           | down   | 760             | 647   | 38     | 5               | 4    | 0      | 755               | 643   | 38     |
|           | normal | 20537           | 16652 | 2181   | 305             | 250  | 28     | 20232             | 16402 | 2153   |
| trisomy18 | up     | 414             | 364   | 17     | 47              | 42   | 1      | 367               | 322   | 16     |
|           | down   | 873             | 705   | 88     | 3               | 3    | 0      | 870               | 702   | 88     |
|           | normal | 20152           | 16331 | 2130   | 254             | 207  | 29     | 19898             | 16124 | 2101   |
| trisomy21 | up     | 162             | 130   | 16     | 39              | 34   | 4      | 123               | 96    | 12     |
|           | down   | 114             | 89    | 12     | 0               | 0    | 0      | 114               | 89    | 12     |
|           | normal | 21163           | 17181 | 2207   | 207             | 150  | 34     | 20956             | 17031 | 2173   |

The number of DEGs with high expression (mean counts > 100, adjusted p-value < 0.05) in human autosomal aneuploidy trisomy 13, trisomy 18, and trisomy 21 is shown in the table.

**Table S5.** The number of DEGs in human sex chromosome aneuploidy XO and XXY.

|        |        | all-transcripts |       |        | X-linked transcripts |      |        | autosomal transcripts |       |        |
|--------|--------|-----------------|-------|--------|----------------------|------|--------|-----------------------|-------|--------|
|        |        | all             | mRNA  | lncRNA | all                  | mRNA | lncRNA | all                   | mRNA  | lncRNA |
| XO/XX  | up     | 280             | 201   | 46     | 12                   | 11   | 1      | 268                   | 190   | 45     |
|        | down   | 330             | 220   | 43     | 32                   | 16   | 9      | 298                   | 204   | 34     |
|        | normal | 43347           | 25078 | 10927  | 1224                 | 823  | 173    | 42088                 | 24239 | 10747  |
| XXY/XY | up     | 119             | 79    | 14     | 24                   | 10   | 8      | 94                    | 69    | 6      |
|        | down   | 102             | 78    | 8      | 3                    | 2    | 0      | 99                    | 76    | 8      |
|        | normal | 43736           | 25342 | 10994  | 1241                 | 838  | 175    | 42461                 | 24488 | 10812  |
| XXY/XX | up     | 129             | 87    | 19     | 3                    | 3    | 0      | 94                    | 69    | 12     |
|        | down   | 133             | 92    | 12     | 3                    | 1    | 0      | 130                   | 91    | 12     |
|        | normal | 43695           | 25320 | 10985  | 1262                 | 846  | 183    | 42430                 | 24473 | 10802  |
| XY/XX  | up     | 130             | 90    | 17     | 0                    | 0    | 0      | 99                    | 76    | 10     |
|        | down   | 179             | 120   | 28     | 19                   | 7    | 8      | 160                   | 113   | 20     |
|        | normal | 43648           | 25289 | 10971  | 1249                 | 843  | 175    | 42395                 | 24444 | 10796  |

The number of significantly up-regulated and down-regulated transcripts (adjusted p-value < 0.05) in human sex chromosome aneuploidy XO and XXY is shown in the table.

**Table S6.** The proportion of up- and down-regulated transcripts in sex chromosome aneuploidy XXY, XXXY, and XXXXY.

|          |           | down-regulated (ratio < 0.8) |        |         |          | up-regulated (ratio > 1.25) |        |         |          |
|----------|-----------|------------------------------|--------|---------|----------|-----------------------------|--------|---------|----------|
|          |           | XX/XY                        | XXY/XY | XXXY/XY | XXXXY/XY | XX/XY                       | XXY/XY | XXXY/XY | XXXXY/XY |
| all type | chrX      | 23.60%                       | 13.76% | 37.27%  | 29.21%   | 28.46%                      | 24.44% | 22.38%  | 29.78%   |
|          | autosomes | 24.85%                       | 13.96% | 33.68%  | 28.67%   | 24.41%                      | 22.13% | 25.64%  | 25.93%   |
| mRNA     | chrX      | 15.21%                       | 9.87%  | 26.70%  | 25.89%   | 22.98%                      | 11.97% | 19.09%  | 21.84%   |
|          | autosomes | 15.69%                       | 8.54%  | 23.18%  | 21.51%   | 18.40%                      | 10.39% | 21.78%  | 18.72%   |
| lncRNA   | chrX      | 24.91%                       | 13.75% | 38.29%  | 31.97%   | 21.19%                      | 20.45% | 21.93%  | 23.05%   |
|          | autosomes | 22.36%                       | 11.58% | 29.90%  | 27.08%   | 22.55%                      | 20.04% | 26.11%  | 23.63%   |

The proportion of up-regulated (ratio > 1.25) and down-regulated (ratio < 0.8) transcripts on X chromosome and autosomes in human sex chromosome aneuploidy XXY, XXXY, and XXXXY is shown in the table.

**Table S7.** The number of up- and down-regulated transcripts in sex chromosome aneuploidy XXY, XXXY, and XXXXY.

|          |        | all-transcripts |       |        | X-linked transcripts |      |        | autosomal transcripts |       |        |
|----------|--------|-----------------|-------|--------|----------------------|------|--------|-----------------------|-------|--------|
|          |        | all             | mRNA  | lncRNA | all                  | mRNA | lncRNA | all                   | mRNA  | lncRNA |
| XX/XY    | up     | 3160            | 2475  | 1697   | 136                  | 109  | 38     | 2999                  | 2364  | 1659   |
|          | down   | 2974            | 1915  | 1580   | 122                  | 93   | 32     | 2778                  | 1807  | 1539   |
|          | normal | 23114           | 11699 | 11720  | 822                  | 416  | 201    | 21907                 | 11261 | 11519  |
| XXY/XY   | up     | 4725            | 2818  | 2589   | 184                  | 110  | 44     | 4476                  | 2705  | 2543   |
|          | down   | 2118            | 1785  | 1142   | 117                  | 112  | 33     | 1987                  | 1672  | 1109   |
|          | normal | 22694           | 11488 | 11311  | 788                  | 396  | 195    | 21487                 | 11057 | 11109  |
| XXXY/XY  | up     | 2062            | 1326  | 1148   | 59                   | 45   | 14     | 1980                  | 1280  | 1134   |
|          | down   | 4122            | 2110  | 2043   | 167                  | 106  | 46     | 3885                  | 2000  | 1996   |
|          | normal | 22981           | 12652 | 11806  | 848                  | 467  | 211    | 21748                 | 12151 | 11587  |
| XXXXY/XY | up     | 3534            | 2816  | 1958   | 143                  | 107  | 36     | 3371                  | 2707  | 1922   |
|          | down   | 4401            | 3146  | 2481   | 198                  | 171  | 63     | 4143                  | 2973  | 2418   |
|          | normal | 21319           | 10127 | 10567  | 738                  | 340  | 172    | 20179                 | 9752  | 10386  |

The number of significantly up-regulated and down-regulated transcripts (t-test p-value < 0.05) in human sex chromosome aneuploidy XXY, XXXY, and XXXXY is shown in the table.

**Table S8.** The number of up- and down-regulated target genes of all TFs in human autosomal aneuploidies.

|            |        | cis-TF (all) |              | trans-TF (all) |              |
|------------|--------|--------------|--------------|----------------|--------------|
|            |        | cis-target   | trans-target | cis-target     | trans-target |
| trisomy 13 | up     | 44           | 344          | 61             | 426          |
|            | down   | 12           | 1432         | 17             | 1964         |
|            | normal | 346          | 30721        | 583            | 40278        |
| trisomy 18 | up     | 2            | 36           | 70             | 830          |
|            | down   | 0            | 119          | 11             | 2277         |
|            | normal | 28           | 2181         | 529            | 40328        |
| trisomy 21 | up     | 53           | 394          | 53             | 440          |
|            | down   | 0            | 332          | 0              | 375          |
|            | normal | 377          | 38837        | 419            | 42720        |

The number of up- and down-regulated (padj < 0.1) target genes of all transcription factors (TFs) in human autosomal aneuploidies trisomy 13, trisomy 18, and trisomy 21 is shown in the table.

**Table S9.** The number of up- and down-regulated targets of positively changed TFs in human autosomal aneuploidies.

|            |        | cis-TF (> 1.25) |              | trans-TF (> 1.25) |              |
|------------|--------|-----------------|--------------|-------------------|--------------|
|            |        | cis-target      | trans-target | cis-target        | trans-target |
| trisomy 13 | up     | 42              | 333          | 60                | 425          |
|            | down   | 12              | 1373         | 17                | 1938         |
|            | normal | 334             | 29765        | 576               | 39938        |
| trisomy 18 | up     | 2               | 33           | 70                | 826          |
|            | down   | 0               | 110          | 11                | 2264         |
|            | normal | 28              | 2078         | 526               | 40165        |
| trisomy 21 | up     | 53              | 394          | 51                | 434          |
|            | down   | 0               | 332          | 0                 | 366          |
|            | normal | 377             | 38837        | 406               | 42247        |

The number of up- and down-regulated (padj < 0.1) target genes of positively changed TFs (> 1.25) in human autosomal aneuploidy trisomy 13, trisomy 18, and trisomy 21 is shown in the table.

**Table S10.** The number of up- and down-regulated targets of negatively changed TFs in human autosomal aneuploidies.

|            |        | cis-TF (< 0.8) |              | trans-TF (< 0.8) |              |
|------------|--------|----------------|--------------|------------------|--------------|
|            |        | cis-target     | trans-target | cis-target       | trans-target |
| trisomy 13 | up     | 10             | 165          | 61               | 424          |
|            | down   | 4              | 620          | 17               | 1948         |
|            | normal | 119            | 13981        | 580              | 40110        |
| trisomy 18 | up     | 2              | 31           | 70               | 827          |
|            | down   | 0              | 105          | 11               | 2264         |
|            | normal | 28             | 1903         | 529              | 40163        |
| trisomy 21 | up     | 12             | 103          | 52               | 434          |
|            | down   | 0              | 91           | 0                | 368          |
|            | normal | 99             | 9836         | 417              | 42446        |

The number of up- and down-regulated (padj < 0.1) target genes of negatively changed TFs (< 0.8) in human autosomal aneuploidy trisomy 13, trisomy 18, and trisomy 21 is shown in the table.

**Table S11.** The number of up- and down-regulated target genes of unchanged TFs in human autosomal aneuploidies.

|            |        | cis-TF (>0.8 & <1.25) |              | trans-TF (>0.8 & <1.25) |              |
|------------|--------|-----------------------|--------------|-------------------------|--------------|
|            |        | cis-target            | trans-target | cis-target              | trans-target |
| trisomy 13 | up     | 1                     | 42           | 61                      | 425          |
|            | down   | 1                     | 148          | 17                      | 1948         |
|            | normal | 30                    | 3371         | 583                     | 40037        |
| trisomy 18 | up     | 2                     | 27           | 70                      | 820          |
|            | down   | 0                     | 94           | 11                      | 2254         |
|            | normal | 28                    | 1659         | 525                     | 40028        |
| trisomy 21 | up     | 42                    | 355          | 52                      | 437          |
|            | down   | 0                     | 296          | 0                       | 374          |
|            | normal | 329                   | 35032        | 417                     | 42572        |

The number of up- and down-regulated (padj < 0.1) target genes of unchanged TFs (> 0.8 and < 1.25) in human autosomal aneuploidy trisomy 13, trisomy 18, and trisomy 21 is shown in the table.

**Table S12.** The results of statistical tests.

| figures         | distribution or comparison       | test           | p-value    |
|-----------------|----------------------------------|----------------|------------|
| Fig. 1A         | trisomy13 cis                    | normality test | 0.0000E+00 |
| Fig. 1B         | trisomy13 trans                  | normality test | 0.0000E+00 |
| Fig. 1C         | trisomy18 cis                    | normality test | 0.0000E+00 |
| Fig. 1D         | trisomy18 trans                  | normality test | 0.0000E+00 |
| Fig. 1E         | trisomy21 cis                    | normality test | 0.0000E+00 |
| Fig. 1F         | trisomy21 trans                  | normality test | 0.0000E+00 |
| Fig. 1-fig. S6A | trisomy13 cis - low vs high      | K-S test       | 1.9635E-02 |
| Fig. 1-fig. S6B | trisomy13 trans - low vs high    | K-S test       | 0.0000E+00 |
| Fig. 1-fig. S6C | trisomy18 cis - low vs high      | K-S test       | 1.1859E-04 |
| Fig. 1-fig. S6D | trisomy18 trans - low vs high    | K-S test       | 0.0000E+00 |
| Fig. 1-fig. S6E | trisomy21 cis - low vs high      | K-S test       | 3.1638E-02 |
| Fig. 1-fig. S6F | trisomy21 trans - low vs high    | K-S test       | 0.0000E+00 |
| Fig. 1-fig. S6A | trisomy13 cis - medium vs high   | K-S test       | 7.7676E-02 |
| Fig. 1-fig. S6B | trisomy13 trans - medium vs high | K-S test       | 0.0000E+00 |
| Fig. 1-fig. S6C | trisomy18 cis - medium vs high   | K-S test       | 4.7205E-02 |
| Fig. 1-fig. S6D | trisomy18 trans - medium vs high | K-S test       | 0.0000E+00 |
| Fig. 1-fig. S6E | trisomy21 cis - medium vs high   | K-S test       | 8.9044E-02 |

|                 |                                                                                  |                |            |
|-----------------|----------------------------------------------------------------------------------|----------------|------------|
| Fig. 1-fig. S6F | trisomy21 trans - medium vs high                                                 | K-S test       | 0.0000E+00 |
| Fig. 1-fig. S6A | trisomy13 cis - low vs medium                                                    | K-S test       | 1.9635E-02 |
| Fig. 1-fig. S6B | trisomy13 trans - low vs medium                                                  | K-S test       | 0.0000E+00 |
| Fig. 1-fig. S6C | trisomy18 cis - low vs medium                                                    | K-S test       | 1.1859E-04 |
| Fig. 1-fig. S6D | trisomy18 trans - low vs medium                                                  | K-S test       | 0.0000E+00 |
| Fig. 1-fig. S6E | trisomy21 cis - low vs medium                                                    | K-S test       | 3.1638E-02 |
| Fig. 1-fig. S6F | trisomy21 trans - low vs medium                                                  | K-S test       | 0.0000E+00 |
| Fig. 2A         | trisomy18/diploid - DC genes identified in trisomy13 vs all chr13 genes          | K-S test       | 4.9869E-01 |
| Fig. 2B         | trisomy21/diploid - DC genes identified in trisomy13 vs all chr13 genes          | K-S test       | 4.6560E-01 |
| Fig. 2C         | trisomy13/diploid - DC genes identified in trisomy18 vs all chr18 genes          | K-S test       | 5.5409E-02 |
| Fig. 2D         | trisomy21/diploid - DC genes identified in trisomy18 vs all chr18 genes          | K-S test       | 1.2115E-02 |
| Fig. 2E         | trisomy13/diploid - DC genes identified in trisomy21 vs all chr21 genes          | K-S test       | 2.3720E-03 |
| Fig. 2F         | trisomy18/diploid - DC genes identified in trisomy21 vs all chr21 genes          | K-S test       | 4.1489E-01 |
| Fig. 2J         | trisomy13/diploid - IDE genes identified in trisomy 18 and 21 vs all chr13 genes | K-S test       | 2.9480E-03 |
| Fig. 2K         | trisomy18/diploid - IDE genes identified in trisomy 13 and 21 vs all chr18 genes | K-S test       | 2.3487E-06 |
| Fig. 2L         | trisomy21/diploid - IDE genes identified in trisomy 13 and 18 vs all chr21 genes | K-S test       | 1.8613E-03 |
| Fig. 2A         | trisomy18/diploid - DC genes identified in trisomy13                             | normality test | 1.3650E-05 |
| Fig. 2B         | trisomy21/diploid - DC genes identified in trisomy13                             | normality test | 1.1770E-01 |
| Fig. 2C         | trisomy13/diploid - DC genes identified in trisomy18                             | normality test | 5.3040E-07 |
| Fig. 2D         | trisomy21/diploid - DC genes identified in trisomy18                             | normality test | 1.1370E-01 |
| Fig. 2E         | trisomy13/diploid - DC genes identified in trisomy21                             | normality test | 2.8470E-01 |
| Fig. 2F         | trisomy18/diploid - DC genes identified in trisomy21                             | normality test | 6.4590E-01 |
| Fig. 2J         | trisomy13/diploid - IDE genes identified in trisomy 18 and 21                    | normality test | 7.0380E-09 |
| Fig. 2K         | trisomy18/diploid - IDE genes identified in trisomy 13 and 21                    | normality test | 8.4840E-12 |
| Fig. 2L         | trisomy21/diploid - IDE genes identified in trisomy 13 and 18                    | normality test | 1.3410E-06 |
| Fig. 3A         | trisomy21 twins cis                                                              | normality test | 6.1850E-08 |
| Fig. 3B         | trisomy21 twins trans                                                            | normality test | 0.0000E+00 |
| Fig. 3C         | trisomy21 unrelated individuals cis                                              | normality test | 2.9980E-15 |
| Fig. 3D         | trisomy21 unrelated individuals trans                                            | normality test | 0.0000E+00 |
| Fig. 3E         | trisomy21 female 2-3 days old cis                                                | normality test | 0.0000E+00 |
| Fig. 3F         | trisomy21 female 2-3 days old trans                                              | normality test | 0.0000E+00 |

|                 |                                                          |                |            |
|-----------------|----------------------------------------------------------|----------------|------------|
| Fig. 3G         | trisomy21 male 1-2 years old cis                         | normality test | 0.0000E+00 |
| Fig. 3H         | trisomy21 male 1-2 years old trans                       | normality test | 0.0000E+00 |
| Fig. 3I         | trisomy21 female 11-19 years old cis                     | normality test | 2.6610E-11 |
| Fig. 3J         | trisomy21 female 11-19 years old trans                   | normality test | 0.0000E+00 |
| Fig. 3K         | trisomy21 male 19-21 years old cis                       | normality test | 9.9250E-14 |
| Fig. 3L         | trisomy21 male 19-21 years old trans                     | normality test | 0.0000E+00 |
| Fig. 3A-C       | trisomy21 cis - twins vs unrelated individuals           | K-S test       | 2.9615E-08 |
| Fig. 3B-D       | trisomy21 trans - twins vs unrelated individuals         | K-S test       | 0.0000E+00 |
| Fig. 3E-G       | trisomy21 cis - female 2-3 days vs male 1-2 years        | K-S test       | 5.5823E-02 |
| Fig. 3F-H       | trisomy21 trans - female 2-3 days vs male 1-2 years      | K-S test       | 0.0000E+00 |
| Fig. 3E-I       | trisomy21 cis - female 2-3 days vs female 11-19 years    | K-S test       | 2.0190E-05 |
| Fig. 3F-J       | trisomy21 trans - female 2-3 days vs female 11-19 years  | K-S test       | 0.0000E+00 |
| Fig. 3E-K       | trisomy21 cis - female 2-3 days vs male 19-21 years      | K-S test       | 4.1559E-05 |
| Fig. 3F-L       | trisomy21 trans - female 2-3 days vs male 19-21 years    | K-S test       | 0.0000E+00 |
| Fig. 3G-I       | trisomy21 cis - male 1-2 years vs female 11-19 years     | K-S test       | 2.7751E-03 |
| Fig. 3H-J       | trisomy21 trans - male 1-2 years vs female 11-19 years   | K-S test       | 0.0000E+00 |
| Fig. 3G-K       | trisomy21 cis - male 1-2 years vs male 19-21 years       | K-S test       | 1.7902E-03 |
| Fig. 3H-L       | trisomy21 trans - male 1-2 years vs male 19-21 years     | K-S test       | 0.0000E+00 |
| Fig. 3I-K       | trisomy21 cis - female 11-19 years vs male 19-21 years   | K-S test       | 8.7020E-01 |
| Fig. 3J-L       | trisomy21 trans - female 11-19 years vs male 19-21 years | K-S test       | 2.2204E-16 |
| Fig. 4A         | trisomy13 cis - mRNA vs lncRNA                           | K-S test       | 1.8172E-01 |
| Fig. 4B         | trisomy13 trans - mRNA vs lncRNA                         | K-S test       | 0.0000E+00 |
| Fig. 4C         | trisomy18 cis - mRNA vs lncRNA                           | K-S test       | 9.0784E-05 |
| Fig. 4D         | trisomy18 trans - mRNA vs lncRNA                         | K-S test       | 0.0000E+00 |
| Fig. 4E         | trisomy21 cis - mRNA vs lncRNA                           | K-S test       | 1.7831E-01 |
| Fig. 4F         | trisomy21 trans - mRNA vs lncRNA                         | K-S test       | 6.6613E-15 |
| Fig. 4-fig. S7A | trisomy13 cis mRNA - low vs high                         | K-S test       | 6.3714E-03 |
| Fig. 4-fig. S7C | trisomy18 cis mRNA - low vs high                         | K-S test       | 2.5040E-04 |
| Fig. 4-fig. S7E | trisomy21 cis mRNA - low vs high                         | K-S test       | 8.0375E-04 |
| Fig. 4-fig. S7A | trisomy13 cis mRNA - medium vs high                      | K-S test       | 1.1507E-07 |
| Fig. 4-fig. S7C | trisomy18 cis mRNA - medium vs high                      | K-S test       | 1.8874E-15 |
| Fig. 4-fig. S7E | trisomy21 cis mRNA - medium vs high                      | K-S test       | 1.4906E-08 |
| Fig. 4-fig. S7A | trisomy13 cis mRNA - low vs medium                       | K-S test       | 7.7870E-03 |
| Fig. 4-fig. S7C | trisomy18 cis mRNA - low vs medium                       | K-S test       | 4.2391E-03 |
| Fig. 4-fig. S7E | trisomy21 cis mRNA - low vs medium                       | K-S test       | 1.8537E-02 |
| Fig. 4-fig. S7B | trisomy13 cis lncRNA - low vs high                       | K-S test       | 5.4989E-02 |
| Fig. 4-fig. S7D | trisomy18 cis lncRNA - low vs high                       | K-S test       | 4.2252E-02 |
| Fig. 4-fig. S7F | trisomy21 cis lncRNA - low vs high                       | K-S test       | 5.1557E-01 |
| Fig. 4-fig. S7B | trisomy13 cis lncRNA - medium vs high                    | K-S test       | 3.0545E-01 |
| Fig. 4-fig. S7D | trisomy18 cis lncRNA - medium vs high                    | K-S test       | 4.4189E-02 |
| Fig. 4-fig. S7F | trisomy21 cis lncRNA - medium vs high                    | K-S test       | 5.7932E-01 |
| Fig. 4-fig. S7B | trisomy13 cis lncRNA - low vs medium                     | K-S test       | 4.0345E-06 |



|                   |                                         |          |            |
|-------------------|-----------------------------------------|----------|------------|
| Fig. 4-fig. S7D   | trisomy18 cis lncRNA - low vs medium    | K-S test | 4.0950E-02 |
| Fig. 4-fig. S7F   | trisomy21 cis lncRNA - low vs medium    | K-S test | 4.5027E-07 |
| Fig. 4-fig. S7A-B | trisomy13 cis low - mRNA vs lncRNA      | K-S test | 4.2754E-04 |
| Fig. 4-fig. S7C-D | trisomy18 cis low - mRNA vs lncRNA      | K-S test | 1.2166E-03 |
| Fig. 4-fig. S7E-F | trisomy21 cis low - mRNA vs lncRNA      | K-S test | 1.1140E-08 |
| Fig. 4-fig. S7A-B | trisomy13 cis medium - mRNA vs lncRNA   | K-S test | 7.4920E-02 |
| Fig. 4-fig. S7C-D | trisomy18 cis medium - mRNA vs lncRNA   | K-S test | 2.1461E-03 |
| Fig. 4-fig. S7E-F | trisomy21 cis medium - mRNA vs lncRNA   | K-S test | 9.5764E-02 |
| Fig. 4-fig. S7A-B | trisomy13 cis high - mRNA vs lncRNA     | K-S test | 4.4374E-03 |
| Fig. 4-fig. S7C-D | trisomy18 cis high - mRNA vs lncRNA     | K-S test | 2.6918E-03 |
| Fig. 4-fig. S7E-F | trisomy21 cis high - mRNA vs lncRNA     | K-S test | 9.7453E-04 |
| Fig. 4-fig. S8A   | trisomy13 trans mRNA - low vs high      | K-S test | 0.0000E+00 |
| Fig. 4-fig. S8C   | trisomy18 trans mRNA - low vs high      | K-S test | 0.0000E+00 |
| Fig. 4-fig. S8E   | trisomy21 trans mRNA - low vs high      | K-S test | 0.0000E+00 |
| Fig. 4-fig. S8A   | trisomy13 trans mRNA - medium vs high   | K-S test | 0.0000E+00 |
| Fig. 4-fig. S8C   | trisomy18 trans mRNA - medium vs high   | K-S test | 0.0000E+00 |
| Fig. 4-fig. S8E   | trisomy21 trans mRNA - medium vs high   | K-S test | 0.0000E+00 |
| Fig. 4-fig. S8A   | trisomy13 trans mRNA - low vs medium    | K-S test | 0.0000E+00 |
| Fig. 4-fig. S8C   | trisomy18 trans mRNA - low vs medium    | K-S test | 0.0000E+00 |
| Fig. 4-fig. S8E   | trisomy21 trans mRNA - low vs medium    | K-S test | 0.0000E+00 |
| Fig. 4-fig. S8B   | trisomy13 trans lncRNA - low vs high    | K-S test | 3.9857E-14 |
| Fig. 4-fig. S8D   | trisomy18 trans lncRNA - low vs high    | K-S test | 0.0000E+00 |
| Fig. 4-fig. S8F   | trisomy21 trans lncRNA - low vs high    | K-S test | 0.0000E+00 |
| Fig. 4-fig. S8B   | trisomy13 trans lncRNA - medium vs high | K-S test | 5.9286E-14 |
| Fig. 4-fig. S8D   | trisomy18 trans lncRNA - medium vs high | K-S test | 0.0000E+00 |
| Fig. 4-fig. S8F   | trisomy21 trans lncRNA - medium vs high | K-S test | 0.0000E+00 |
| Fig. 4-fig. S8B   | trisomy13 trans lncRNA - low vs medium  | K-S test | 0.0000E+00 |
| Fig. 4-fig. S8D   | trisomy18 trans lncRNA - low vs medium  | K-S test | 0.0000E+00 |
| Fig. 4-fig. S8F   | trisomy21 trans lncRNA - low vs medium  | K-S test | 0.0000E+00 |
| Fig. 4-fig. S8A-B | trisomy13 trans low - mRNA vs lncRNA    | K-S test | 0.0000E+00 |
| Fig. 4-fig. S8C-D | trisomy18 trans low - mRNA vs lncRNA    | K-S test | 0.0000E+00 |
| Fig. 4-fig. S8E-F | trisomy21 trans low - mRNA vs lncRNA    | K-S test | 0.0000E+00 |
| Fig. 4-fig. S8A-B | trisomy13 trans medium - mRNA vs lncRNA | K-S test | 0.0000E+00 |
| Fig. 4-fig. S8C-D | trisomy18 trans medium - mRNA vs lncRNA | K-S test | 0.0000E+00 |
| Fig. 4-fig. S8E-F | trisomy21 trans medium - mRNA vs lncRNA | K-S test | 0.0000E+00 |
| Fig. 4-fig. S8A-B | trisomy13 trans high - mRNA vs lncRNA   | K-S test | 0.0000E+00 |
| Fig. 4-fig. S8C-D | trisomy18 trans high - mRNA vs lncRNA   | K-S test | 0.0000E+00 |
| Fig. 4-fig. S8E-F | trisomy21 trans high - mRNA vs lncRNA   | K-S test | 0.0000E+00 |
| Fig. 5A           | chrX all genes - XO/XX vs XY/XX         | K-S test | 3.5310E-03 |
| Fig. 5A           | chrX all genes - XO/XX vs XXY/XX        | K-S test | 8.9655E-06 |
| Fig. 5A           | chrX all genes - XY/XX vs XXY/XX        | K-S test | 7.8900E-06 |
| Fig. 5A           | chrX all genes - XO/XX vs XXY/XY        | K-S test | 9.1982E-07 |
| Fig. 5A           | chrX all genes - XY/XX vs XXY/XY        | K-S test | 1.7250E-10 |

|         |                                          |          |            |
|---------|------------------------------------------|----------|------------|
| Fig. 5B | autosome all genes - XO/XX vs XY/XX      | K-S test | 0.0000E+00 |
| Fig. 5B | autosome all genes - XO/XX vs XXY/XX     | K-S test | 0.0000E+00 |
| Fig. 5B | autosome all genes - XY/XX vs XXY/XX     | K-S test | 0.0000E+00 |
| Fig. 5B | autosome all genes - XO/XX vs XXY/XY     | K-S test | 0.0000E+00 |
| Fig. 5B | autosome all genes - XY/XX vs XXY/XY     | K-S test | 0.0000E+00 |
| Fig. 5C | chrX mRNA - XO/XX vs XY/XX               | K-S test | 4.7309E-02 |
| Fig. 5C | chrX mRNA - XO/XX vs XXY/XX              | K-S test | 2.4176E-01 |
| Fig. 5C | chrX mRNA - XY/XX vs XXY/XX              | K-S test | 2.1037E-01 |
| Fig. 5C | chrX mRNA - XO/XX vs XXY/XY              | K-S test | 3.7891E-01 |
| Fig. 5C | chrX mRNA - XY/XX vs XXY/XY              | K-S test | 1.6563E-01 |
| Fig. 5D | autosome mRNA - XO/XX vs XY/XX           | K-S test | 3.3307E-16 |
| Fig. 5D | autosome mRNA - XO/XX vs XXY/XX          | K-S test | 9.5024E-13 |
| Fig. 5D | autosome mRNA - XY/XX vs XXY/XX          | K-S test | 1.3433E-02 |
| Fig. 5D | autosome mRNA - XO/XX vs XXY/XY          | K-S test | 0.0000E+00 |
| Fig. 5D | autosome mRNA - XY/XX vs XXY/XY          | K-S test | 0.0000E+00 |
| Fig. 5E | chrX lncRNA - XO/XX vs XY/XX             | K-S test | 2.9243E-01 |
| Fig. 5E | chrX lncRNA - XO/XX vs XXY/XX            | K-S test | 2.0961E-05 |
| Fig. 5E | chrX lncRNA - XY/XX vs XXY/XX            | K-S test | 1.5809E-05 |
| Fig. 5E | chrX lncRNA - XO/XX vs XXY/XY            | K-S test | 1.5674E-08 |
| Fig. 5E | chrX lncRNA - XY/XX vs XXY/XY            | K-S test | 5.8376E-13 |
| Fig. 5F | autosome lncRNA - XO/XX vs XY/XX         | K-S test | 4.4020E-12 |
| Fig. 5F | autosome lncRNA - XO/XX vs XXY/XX        | K-S test | 0.0000E+00 |
| Fig. 5F | autosome lncRNA - XY/XX vs XXY/XX        | K-S test | 0.0000E+00 |
| Fig. 5F | autosome lncRNA - XO/XX vs XXY/XY        | K-S test | 0.0000E+00 |
| Fig. 5F | autosome lncRNA - XY/XX vs XXY/XY        | K-S test | 0.0000E+00 |
| Fig. 5G | chrX all genes - XX/XY vs XXY/XY         | K-S test | 1.2821E-07 |
| Fig. 5G | chrX all genes - XXXY/XY vs XXY/XY       | K-S test | 0.0000E+00 |
| Fig. 5G | chrX all genes - XXXXY/XY vs XXY/XY      | K-S test | 6.6613E-16 |
| Fig. 5G | chrX all genes - XXXY/XY vs XXXXY/XY     | K-S test | 4.4195E-05 |
| Fig. 5H | autosome all genes - XX/XY vs XXY/XY     | K-S test | 0.0000E+00 |
| Fig. 5H | autosome all genes - XXXY/XY vs XXY/XY   | K-S test | 0.0000E+00 |
| Fig. 5H | autosome all genes - XXXXY/XY vs XXY/XY  | K-S test | 0.0000E+00 |
| Fig. 5H | autosome all genes - XXXY/XY vs XXXXY/XY | K-S test | 0.0000E+00 |
| Fig. 5I | chrX mRNA - XX/XY vs XXY/XY              | K-S test | 1.7458E-04 |
| Fig. 5I | chrX mRNA - XXXY/XY vs XXY/XY            | K-S test | 1.0285E-10 |
| Fig. 5I | chrX mRNA - XXXXY/XY vs XXY/XY           | K-S test | 6.1279E-12 |
| Fig. 5I | chrX mRNA - XXXY/XY vs XXXXY/XY          | K-S test | 3.7880E-01 |
| Fig. 5J | autosome mRNA - XX/XY vs XXY/XY          | K-S test | 0.0000E+00 |
| Fig. 5J | autosome mRNA - XXXY/XY vs XXY/XY        | K-S test | 0.0000E+00 |
| Fig. 5J | autosome mRNA - XXXXY/XY vs XXY/XY       | K-S test | 0.0000E+00 |
| Fig. 5J | autosome mRNA - XXXY/XY vs XXXXY/XY      | K-S test | 1.4113E-07 |
| Fig. 5K | chrX lncRNA - XX/XY vs XXY/XY            | K-S test | 2.8385E-03 |
| Fig. 5K | chrX lncRNA - XXXY/XY vs XXY/XY          | K-S test | 8.5424E-09 |

|         |                                       |                |            |
|---------|---------------------------------------|----------------|------------|
| Fig. 5K | chrX lncRNA - XXXXY/XY vs XXY/XY      | K-S test       | 1.1366E-05 |
| Fig. 5K | chrX lncRNA - XXXY/XY vs XXXXY/XY     | K-S test       | 3.8536E-01 |
| Fig. 5L | autosome lncRNA - XX/XY vs XXY/XY     | K-S test       | 0.0000E+00 |
| Fig. 5L | autosome lncRNA - XXXY/XY vs XXY/XY   | K-S test       | 0.0000E+00 |
| Fig. 5L | autosome lncRNA - XXXXY/XY vs XXY/XY  | K-S test       | 0.0000E+00 |
| Fig. 5L | autosome lncRNA - XXXY/XY vs XXXXY/XY | K-S test       | 3.5033E-10 |
| Fig. 6A | trisomy13 - cis-TF vs trans-TF        | K-S test       | 3.0743E-01 |
| Fig. 6C | trisomy18 - cis-TF vs trans-TF        | K-S test       | 2.3959E-02 |
| Fig. 6E | trisomy21 - cis-TF vs trans-TF        | K-S test       | 1.8422E-07 |
| Fig. 6A | trisomy13 cis-TF                      | normality test | 7.2979E-03 |
| Fig. 6A | trisomy13 trans-TF                    | normality test | 0.0000E+00 |
| Fig. 6C | trisomy18 cis-TF                      | normality test | 8.8798E-01 |
| Fig. 6C | trisomy18 trans-TF                    | normality test | 0.0000E+00 |
| Fig. 6E | trisomy21 cis-TF                      | normality test | 7.4278E-04 |
| Fig. 6E | trisomy21 trans-TF                    | normality test | 0.0000E+00 |
